# Supplementary material for: Neutrophil trafficking on-a-chip: an in vitro, organotypic model for investigating neutrophil priming, extravasation, and migration with spatiotemporal control
Source: Royal Society of Chemistry journal article supplement (doi:10.1039/c9lc00562e), 2019-01-01
Supplement: c9lc00562e1.pdf [file c9lc00562e1.pdf]

## Supplementary Information

### Collagen Retention %

|                    |      | Bore Height (mm) |                  |                  |
|--------------------|------|------------------|------------------|------------------|
|                    |      | 0.25             | 0.5              | 0.75             |
| Bore Diameter (mm) | 0.5  | 56.67<br>(±15.3) | 73.33<br>(±11.5) | 83.33<br>(±5.8)  |
|                    | 0.75 | 26.67<br>(±5.8)  | 60.00<br>(±10)   | 70.00<br>(±17.3) |
|                    | 1    | 16.67<br>(±15.3) | 36.67<br>(±5.8)  | 43.33<br>(±15.3) |

**Supplementary Figure 1:** Table showing collagen retention rate in Stacks layers with various bore diameters and heights.

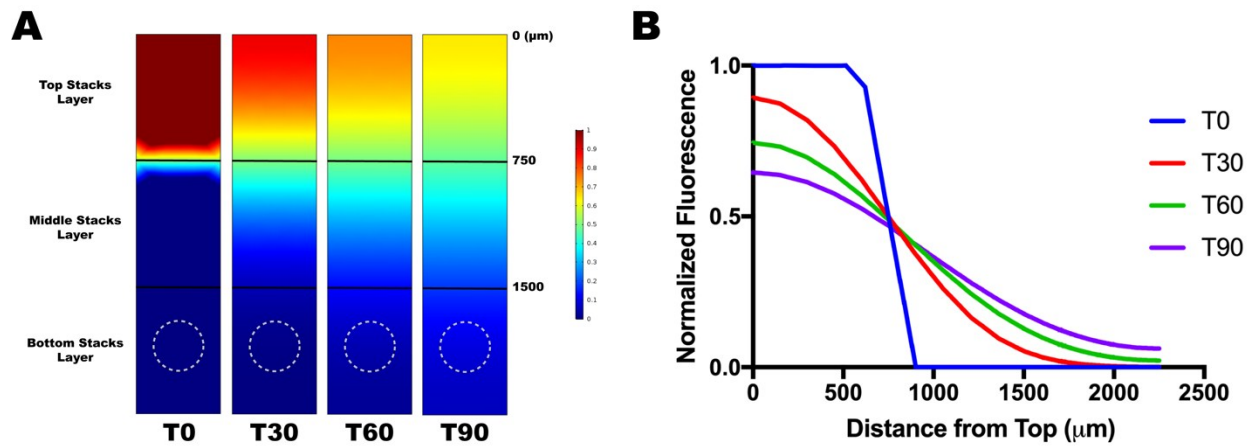

**Supplementary Figure 2:** COMSOL model of 10 kDa FITC-dextran diffusion through a hydrogel similar in porosity and density to 4mg/mL Collagen-I in a LENS device. **A** – Computed diffusion profiles at T = 0 min through T = 90 min. **B** – Quantified normalized fluorescence vs. distance from top of stacks layer at different time points.

| Gene     | Assay ID            | Gene Function                                                                                                                                                                                                                                                                                                                         |
|----------|---------------------|---------------------------------------------------------------------------------------------------------------------------------------------------------------------------------------------------------------------------------------------------------------------------------------------------------------------------------------|
| ACTB     | Hs.PT.39a.22214847  | Encodes for beta-actin, one of the two non-muscle cytoskeletal actins                                                                                                                                                                                                                                                                 |
| GAPDH    | Hs.PT.39a.22214836  | Encodes for glyceraldehyde 3-phosphate dehydrogenase, an enzyme that catalyzes the sixth step of glycolysis                                                                                                                                                                                                                           |
| CYBB     | Hs.PT.58.15232180   | Encodes for NADPH oxidase 2 (NOX2), a super-oxide generating enzyme which forms ROS                                                                                                                                                                                                                                                   |
| NCF1     | Hs.PT.58.26118879   | Encodes for p47Phox, a 47kDa cytosolic subunit of neutrophil NADPH Oxidase                                                                                                                                                                                                                                                            |
| NCF2     | Hs.PT.58.255793     | Encodes for p67Phox, a 67kDa cytosolic subunit of neutrophil NADPH Oxidase                                                                                                                                                                                                                                                            |
| NFKB1    | Hs.PT.58.20344216   | Encodes for NFkB p105 subunit, a transcription factor which stimulates the expression of genes involved in a wide variety of biological functions                                                                                                                                                                                     |
| NFKBIA   | Hs.PT.58.15498666.g | Encodes for I kB $\alpha$ , an inhibitor of NFkB                                                                                                                                                                                                                                                                                      |
| CEACAM8  | Hs.PT.58.39067762   | Encodes for carcinoembryonic antigen-related cell adhesion molecule 8, also known as CD66b, involved in cell adhesion, cell migration, and pathogen binding. Expressed exclusively on Granulocytes                                                                                                                                    |
| ITGAM    | Hs.PT.58.40141028   | Encodes for integrin alpha M, also known as macrophage-1 antigen (Mac-1), and CD11b, involved in cell adhesion and migration. It is involved with several immune processes such as chemotaxis, cell activation, and phagocytosis. It is expressed on the surface of many leukocytes of the innate immune system including neutrophils |
| PECAM1   | Hs.PT.58.19487865   | Encodes for platelet endothelial cell adhesion molecule, found on the surface of neutrophils and is involved in leukocyte transmigration, and removing aged neutrophils from circulation                                                                                                                                              |
| SELL     | Hs.PT.58.463962     | Encodes for L-selectin, also known as CD62L, is involved in cell adhesion. Found on surface of leukocytes                                                                                                                                                                                                                             |
| CXCR2    | Hs.PT.58.41092811   | Encodes for interleukin 8 receptor beta, is a G-protein-coupled receptor involved with sensing extracellular IL-8                                                                                                                                                                                                                     |
| TNFRSF1A | Hs.PT.58.19429998   | Encodes for tumor necrosis factor receptor 1, also known as CD120a, is the major cell surface receptor for TNF $\alpha$ , and is involved with mediating apoptosis and inflammation                                                                                                                                                   |
| RSAD2    | Hs.PT.58.713843     | Encodes for Viperin, is a cellular protein involved in inhibiting many DNA and RNA viruses                                                                                                                                                                                                                                            |
| CXCL8    | Hs.PT.58.39926886.g | Encodes for interleukin 8, involved in mediating neutrophil chemotaxis                                                                                                                                                                                                                                                                |

**Supplementary Figure 3:** Table of IDT PrimeTime qPCR primers used for qPCR analysis
